# Supplementary material
Source: PubMed Central journal article supplement (PMC8050470)
Supplement: 2859_materials.pdf [file 2859_materials.pdf]

**On-line Table: Relations between FT-segmented parameters and patient-specific factors<sup>a</sup>**

| Covariate/Factor          | GA     |                   | PMA    |                   | HC    |                   | WM Score |                   | Sex               |
|---------------------------|--------|-------------------|--------|-------------------|-------|-------------------|----------|-------------------|-------------------|
|                           | a1     | P                 | a2     | P                 | a3    | P                 | a4       | P                 | P                 |
| CC bundle volume          | 546    | .001 <sup>b</sup> | —      | —                 | 903   | .000 <sup>b</sup> | −681     | .000 <sup>b</sup> | —                 |
| CC FA                     | —      | —                 | 0.005  | .004 <sup>b</sup> | 0.003 | .052              | −0.003   | .038 <sup>c</sup> | —                 |
| CC CI                     | —      | —                 | 0.003  | .004 <sup>b</sup> | 0.003 | .002 <sup>b</sup> | −0.002   | .001 <sup>b</sup> | —                 |
| CC MD                     | —      | —                 | −0.017 | .035 <sup>c</sup> | —     | —                 | 0.018    | .001 <sup>b</sup> | —                 |
| CC axial diffusivity      | —      | —                 | —      | —                 | —     | —                 | 0.020    | .010 <sup>c</sup> | —                 |
| CC radial diffusivity     | —      | —                 | −0.019 | .007 <sup>b</sup> | —     | —                 | 0.017    | .003 <sup>b</sup> | —                 |
| CC bundle length          | 1.822  | .000 <sup>b</sup> | —      | —                 | 1.42  | .006 <sup>b</sup> | −1.30    | .001 <sup>b</sup> | .010 <sup>c</sup> |
| PLIC L bundle volume      | —      | —                 | 232    | .014 <sup>c</sup> | —     | —                 | —        | —                 | —                 |
| PLIC L FA                 | −0.006 | .007 <sup>b</sup> | 0.010  | .001 <sup>b</sup> | —     | —                 | —        | —                 | —                 |
| PLIC L CI                 | —      | —                 | 0.004  | .001 <sup>b</sup> | —     | —                 | —        | —                 | —                 |
| PLIC L MD                 | 0.014  | .006 <sup>b</sup> | −0.20  | .003 <sup>b</sup> | —     | —                 | 0.014    | .002 <sup>b</sup> | —                 |
| PLIC L axial diffusivity  | 0.016  | .010 <sup>b</sup> | −0.018 | .019 <sup>c</sup> | —     | —                 | 0.017    | .001 <sup>b</sup> | —                 |
| PLIC L radial diffusivity | 0.014  | .006 <sup>b</sup> | −0.021 | .001 <sup>b</sup> | —     | —                 | 0.012    | .004 <sup>b</sup> | —                 |
| PLIC L bundle length      | —      | —                 | —      | —                 | —     | —                 | —        | —                 | —                 |
| PLIC R bundle volume      | 229    | .006 <sup>b</sup> | 287    | .008 <sup>b</sup> | —     | —                 | —        | —                 | —                 |
| PLIC R FA                 | —      | —                 | 0.008  | .005 <sup>b</sup> | —     | —                 | —        | —                 | —                 |
| PLIC R CI                 | —      | —                 | —      | —                 | —     | —                 | —        | —                 | —                 |
| PLIC R MD                 | —      | —                 | −0.018 | .008 <sup>b</sup> | —     | —                 | 0.010    | .032 <sup>c</sup> | —                 |
| PLIC R axial diffusivity  | —      | —                 | −0.018 | .017 <sup>c</sup> | —     | —                 | 0.013    | .008 <sup>b</sup> | —                 |
| PLIC R radial diffusivity | —      | —                 | −0.018 | .008 <sup>b</sup> | —     | —                 | —        | —                 | —                 |
| PLIC R bundle length      | 0.82   | .023 <sup>c</sup> | —      | —                 | 0.895 | .022 <sup>c</sup> | —        | —                 | —                 |

**Note:**— Dash indicates “not significant”.

<sup>a</sup> Investigated using a general linear model with equation DTI parameter = a1 \* GA + a2 \* PMA + a3 \* HC + a4 \* WMI + a5 \* BW + f1 \* Sex. For each FT parameter (rows), the slope (a1-a4) is given. For the factor, no slope is given, only the P value. The P value is shown for the influence of the patient factors and covariates (columns) with P < .01 or P < .05. No value indicates no significant influence; then, no slope is given. BW had no significant role in the model and was, therefore, not displayed in this Table.

<sup>b</sup> P < .01.

<sup>c</sup> P < .05.

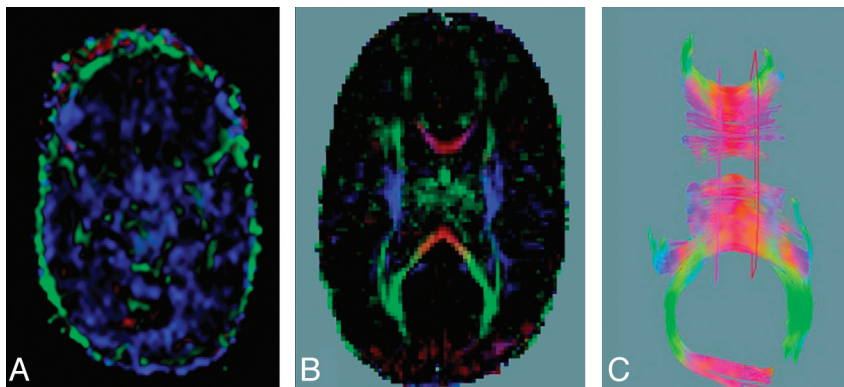

**On-Line Figure.** Examples of artifacts leading to exclusion of the dataset. *A*, DTI image artifacts due to motion artifacts. The color map displays a completely wrong color. *B*, DTI artifacts due to sensitivity encoding artifacts. The color map displays a large red area posterior. *C*, Artifactual fibers. Errors in FT, resulting in fibers in areas with artifacts.
